# Supplementary material
Source: Research Square preprint supplement (doi:10.21203/rs.3.rs-9529609/v1)
Supplement: Supplementary file 1 [file a37ab312eafb4717bc618410.docx]

*Supplementary Information to:*

**A Reproducible Framework for Safe LLM-Based Simplification of ICU Discharge Summaries in Clinical Information Systems**

**Supplementary Information**

**Prompt Templates for LLM-Based Discharge Summary Simplification**

*For submission with the main manuscript*

This Supplementary Information provides the full prompt templates used for all experimental conditions evaluated in the study. The templates are referenced in the Methods section of the main manuscript and are included here to support transparency and reproducibility.

**Formatting note.** Section labels, prompt headings, and placeholder fields were standardized for consistency. Prompt content was preserved and not substantively altered.

**A.1 Zero-Shot Prompt Template**

| [System] You are a medical communication specialist. Your task is to rewrite clinical discharge summaries into clear, plain English that a patient reading at a 6th-to-8th-grade level can understand.  CRITICAL PRIORITY:  Clinical accuracy and completeness take priority over brevity or style. Do not simplify in ways that remove, merge, or change medical facts.  HARD REQUIREMENTS (MUST FOLLOW):  - Keep the same section headers exactly as the input (do not rename them).  - Do NOT add information not present in the original.  - Preserve ALL diagnoses, medications (names and doses), follow-up instructions, appointment details, return precautions, and emergency instructions.  - Medication names, diagnosis names, and ALL numerical values MUST appear exactly as written in the original text at least once (verbatim string match).  - Preserve negation exactly (do not drop 'no', 'not', 'denies', 'without', etc.).  - Leave de-identification placeholders [**...**] exactly as they appear.  SECTION-SPECIFIC RULES:  A) [Discharge Diagnosis]  - Keep each diagnosis verbatim on its own line.  - Most diagnoses should remain verbatim with no explanation.  - Only for uncommon or high-risk terms, you may add a very short plain-English explanation after ' — ' (dash), but do NOT change the diagnosis text.  - Use at most 2 total explanations in the entire note.  Example: 'Hypertension — high blood pressure'  B) [Discharge Medications]  - Keep the medication name + dose + formulation exactly as written.  - Rewrite only the SIG/DISP/REFILLS into compact patient-friendly text.  - Keep each medication as one compact item.  - Use this template per item:  '<Drug Name Dose Form>: Take <amount> by mouth <frequency> for <duration>. Dispense: <dispense>. Refills: <refills>.'  - Prefer compact labels such as 'Dispense: 60. Refills: 0.' over longer sentences.  - Expand abbreviations on first occurrence only (for example, 'PO (by mouth)').  - Do not replace drug names with drug classes.  - Do not repeat medication names in other sections unless the original text does.  C) [Discharge Condition]  - Keep this section concise and clear.  - Minor wording simplification is allowed without changing meaning.  - Prefer short phrases and short sentences.  D) [Brief Hospital Course]  - This is a primary section to simplify for readability.  - Rewrite this section as 3 to 8 short bullet points whenever possible.  - Each bullet should contain one main idea.  - Use short sentences (15 words or fewer when possible; 20 words maximum if needed).  - Replace medical jargon with everyday language.  - Use safe substitutions outside medication and diagnosis spans, for example: 'hemodynamically stable' -> 'blood pressure and heart rate were stable', 'tolerating diet' -> 'able to eat', 'ambulating' -> 'walking', 'extubated' -> 'breathing without the breathing tube', and 'discharged home' -> 'went home'.  - Do NOT repeat medication or diagnosis names here unless the original text does.  E) [Discharge Instructions]  - Rewrite as short bullet points whenever possible.  - Use direct patient-action phrasing such as 'Call 911 if...', 'Call your doctor if...', 'Do not...', and 'Follow up with...'.  - Keep one idea per bullet or sentence.  - Use simple words and active voice.  - Do NOT repeat medication or diagnosis names here unless the original text does.  F) [Followup Instructions]  - Rewrite this section into short, scannable bullets.  - Preserve all original details exactly, including provider names, dates, times, locations, phone numbers, and appointment instructions.  - When possible, format each follow-up item using compact labels such as 'Who: ...', 'When: ...', 'Where: ...', and 'Phone: ...'.  - Do not delete any follow-up detail.  STYLE:  - Prefer simple words and active voice.  - Keep one idea per sentence.  - Expand abbreviations on first occurrence only.  - Avoid extra explanations.  - Do not repeat diagnoses or medications in narrative sections unless the original text repeats them.  - Aim to improve readability mainly by shortening sentences, using bullet points, and simplifying narrative wording, not by changing medical facts.  [User] Rewrite the discharge summary using the system rules.  Keep all section headers exactly as they appear.  IMPORTANT: Apply the section-specific rules:  - [Discharge Medications]: keep drug name+dose+form verbatim; rewrite SIG/DISP/REFILLS in compact plain English using 'Dispense:' and 'Refills:' when present.  - [Discharge Diagnosis]: keep diagnoses verbatim; explain only rare or high-risk terms, and use at most 2 brief '—' explanations in the note.  - [Brief Hospital Course]: rewrite as 3 to 8 short bullet points whenever possible; keep one main idea per bullet and aim for 15 words or fewer when possible.  - [Discharge Instructions]: use short bullets and direct patient phrasing such as 'Call 911 if', 'Call your doctor if', 'Do not', and 'Follow up with'.  - [Followup Instructions]: preserve every appointment detail and, when possible, format each item with compact labels like 'Who:', 'When:', 'Where:', and 'Phone:'.  - Apply safe jargon substitutions only outside medication and diagnosis spans.  {clinical text} |
| --- |

**A.2 Few-Shot Prompt Template**

| [User] Below are examples of discharge summaries rewritten into plain English for patients. Follow the same style and the system rules.  === Example 1: Original ===  {candidate note 1}  === Example 1: Simplified ===  {GPT-4o simplified version of candidate 1}  === Example 2: Original ===  {candidate note 2}  === Example 2: Simplified ===  {GPT-4o simplified version of candidate 2}  === Example 3: Original ===  {candidate note 3}  === Example 3: Simplified ===  {GPT-4o simplified version of candidate 3}  Now simplify the following discharge summary in the same style.  Keep headers identical. Apply section-specific rules for Diagnosis and Medications. Keep medication formatting compact. Simplify primarily [Brief Hospital Course], [Discharge Instructions], and [Followup Instructions] using short bullets, one idea per bullet, and labeled follow-up details when possible.  === Input ===  {clinical text} |
| --- |

**A.3 Chain-of-Thought Prompt Template**

| [User] Simplify the following clinical discharge summary into plain English for a patient. Think step by step:  Step 1: For each section, identify ALL key medical facts: diagnoses, medications (with exact names, doses, and frequencies), follow-up appointments, return precautions, and discharge instructions.  Step 2: Translate medical jargon into plain, everyday language. Expand abbreviations on first occurrence only (e.g. b.i.d. -> twice a day). Keep exact drug names and numerical values unchanged.  Step 3: Write the final simplified summary, keeping all section headers exactly as they appear in the input. Keep Diagnosis lines verbatim. Keep Medication name+dose+form verbatim and rewrite only the SIG/DISP/REFILLS into compact patient-friendly language using 'Dispense:' and 'Refills:' when present. Rewrite [Brief Hospital Course] as 3 to 8 short bullets whenever possible. Rewrite [Discharge Instructions] with direct patient-action bullets. Rewrite [Followup Instructions] as short bullets and preserve provider names, dates, times, locations, phone numbers, and appointment details exactly, using labels such as 'Who:', 'When:', 'Where:', and 'Phone:' when possible. Keep one idea per bullet or sentence.  Step 4: Carefully verify your output against the original:  - Is every diagnosis name preserved verbatim on its own line?  - Is every medication name, dose, formulation, and frequency preserved verbatim?  - Are the SIG/DISP/REFILLS rewritten clearly and compactly?  - Are all follow-up instructions, appointment details, return precautions, and emergency instructions included?  - Did you avoid repeating medication or diagnosis names in narrative sections?  - Are the Hospital Course and instruction sections short, scannable, and limited to one idea per bullet when possible?  - Is every medical negation ('no', 'not', 'without', 'denies') kept intact?  If anything is missing or altered, fix it now.  Output ONLY the final simplified summary from Step 3 (after the Step 4 verification). Do not include any step labels or reasoning.  Discharge summary:  {clinical text} |
| --- |

*Abbreviations: LLM, large language model.*
